# Supplementary material for: Identification and expression profiles of the YABBY transcription factors in wheat
Source: PeerJ journal article supplement (doi:10.7717/peerj.12855), 2022-02-03

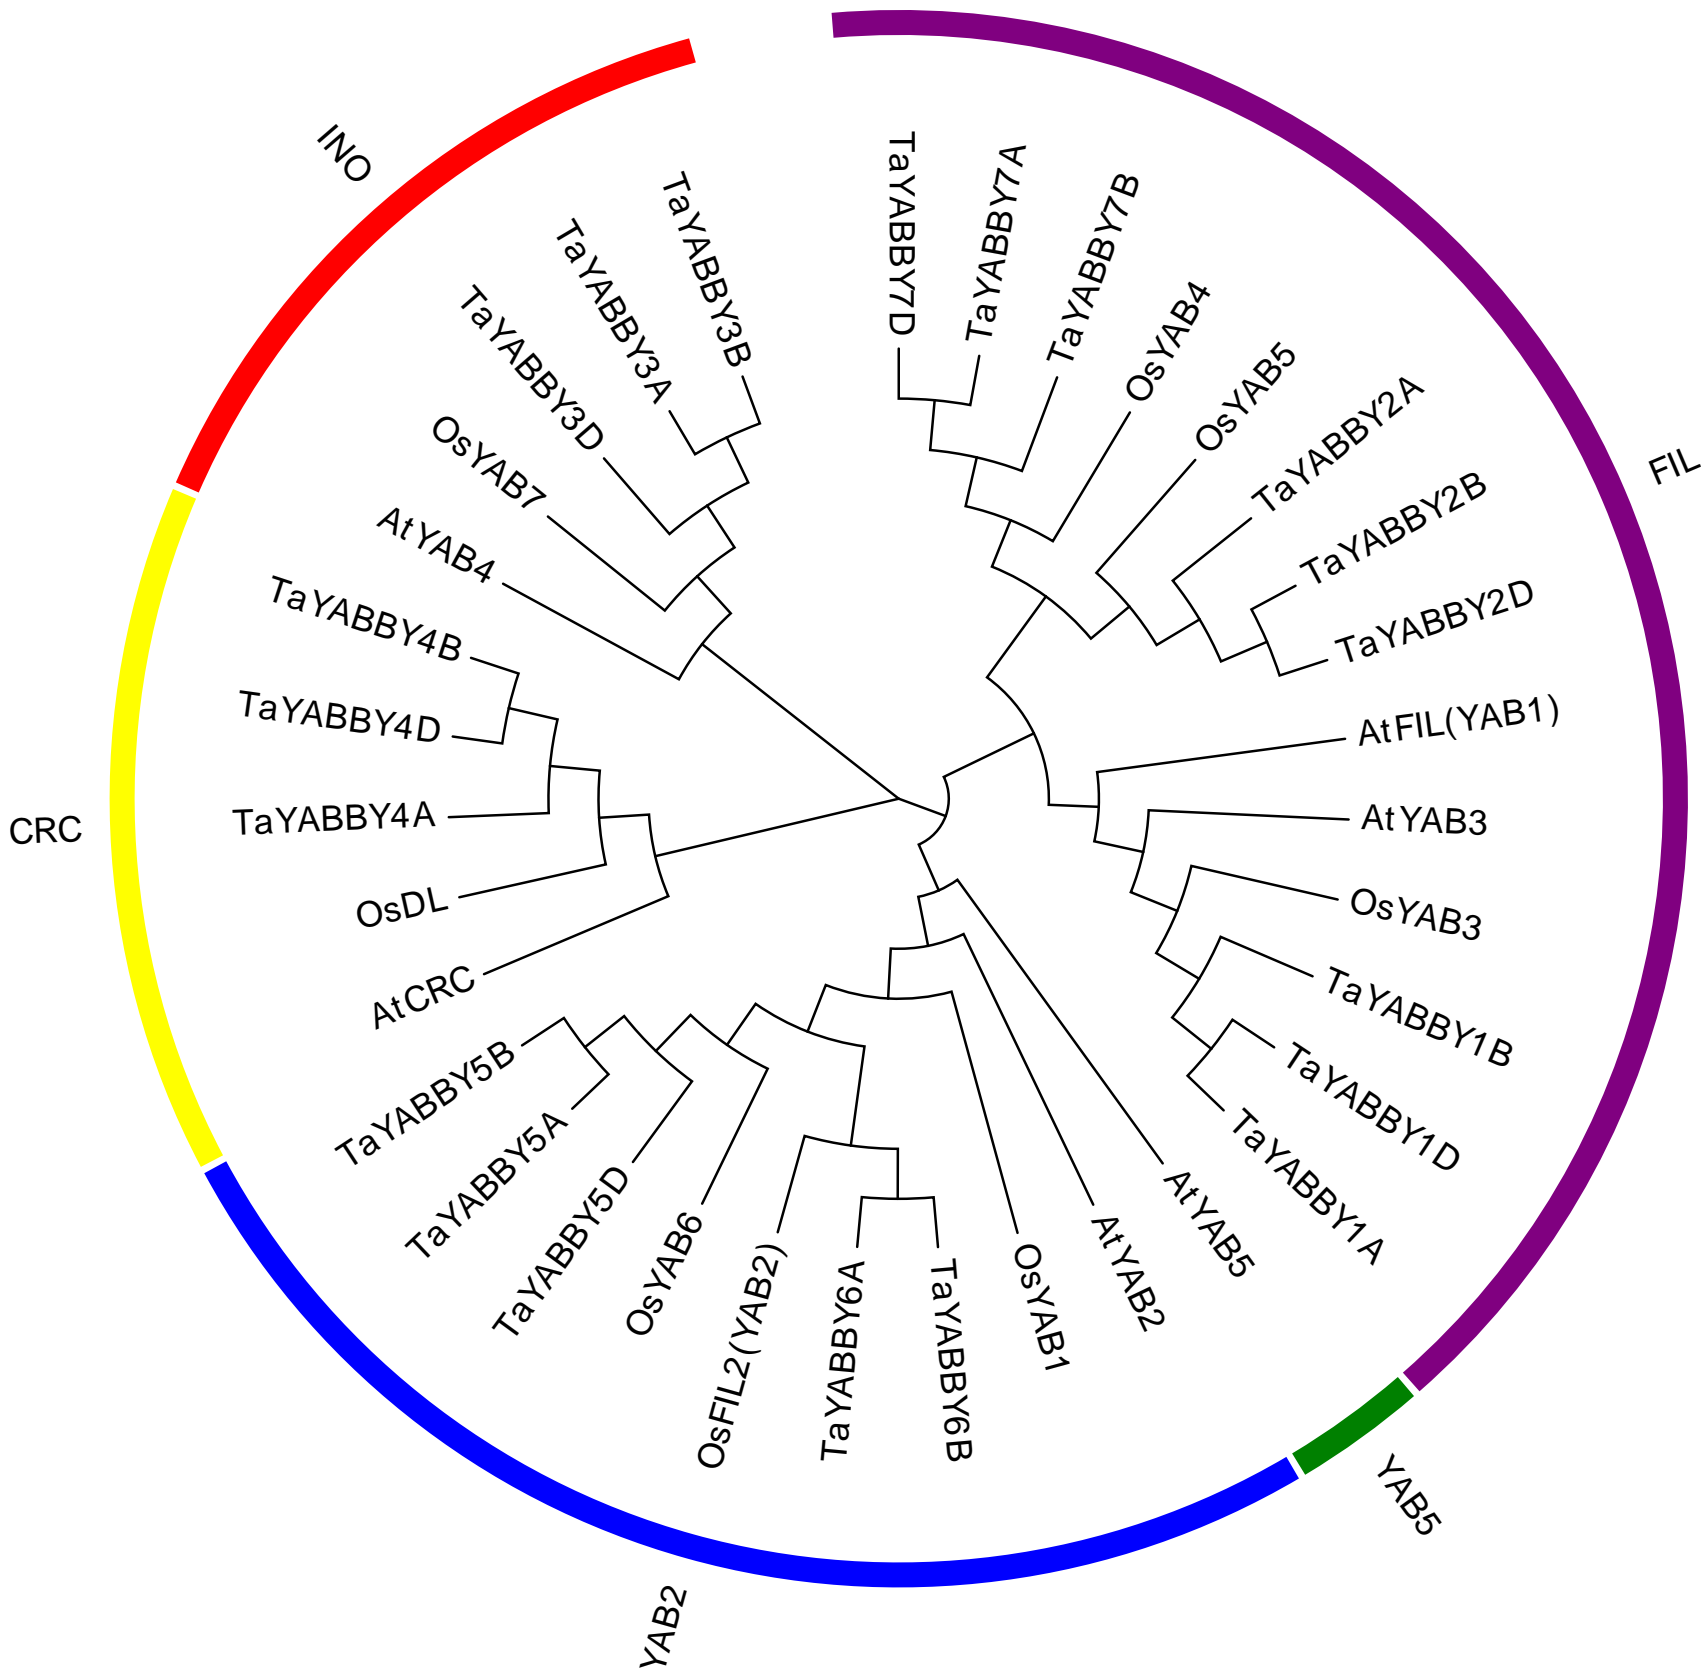

Supplement: Figure_S1.pdf [file Figure_S1.pdf]
