# Supplementary material for: Identification and expression profiles of the YABBY transcription factors in wheat
Source: PeerJ. 2022 Feb 3;10:e12855. doi: 10.7717/peerj.12855 (PMC8818270; doi:10.7717/peerj.12855)
Supplement: Supplemental Information 2 [file peerj-10-12855-s002.xlsx]

## Sheet: Table S1
Table S1 Primers used in this study
Gene name	Forward primers	Reverse primers
TaYABBY1B	ATCAAGGCTGGCAATCCCGACA	AGTCCCTCCTTTAGAAGCCCAT
TaYABBY1A/D	ATCAAGGCTGGCAATCCCGACA	ATGGGCTTCTAAAGGAGGGGCT
TaYABBY2A/B/D	CACTGCCGTCAACAAACCG	GGCTCCATGGCTTTAATCCTC
TaYABBY3A/B	GGGCTCATTTTCCACACATCCAT	TGCAATCCCCAGCTCCGTCC
TaYABBY3D	GGGCTCATTTTCCACACATCCAT	GGACGGGGCTGGGGATTGCA
TaYABBY4A	ACCATCTGCCTACAATCGCTT	CGCACTTCGCCCAGTTCTTAGCA
TaYABBY4B	ACCATCAGCCTACAATCGCTT	CGCACTTCGCCCAGTTCTTAGCA
TaYABBY4D	GCCATCTGCCTACAATCGCTT	CGCACTTCGCCCAGTTCTTAGCA
TaYABBY5A	ATCAAAGCAAACAACCCCGACA	GCCAGCCTCTTGCCATCGT
TaYABBY5B	ATCAAAGCAAACAACCCCGACA	GCGAGCCTCTTGCCACCGT
TaYABBY5D	ATAAAGGCAAACAACCCCGACA	GCGAGCCTCTTGCCACCGT
TaYABBY6A/B	GCAACACAATTCTCGCGGTCA	CTCCTGGGAATGATCTTGCAC
TaYABBY7A/B/D	GCCCATTTCCCGCACATCCACT	CCGCCGCAGCATAGAGACCA

## Sheet: Table S2
Table S2 Duplication analysis among wheat
gene ID	Chromosome location			gene ID	Chromosome location
TaYABBY5A	2A	631967177	631969484	TaYABBY4D	6D	310520716	310523936
TaYABBY5B	2B	571531403	571533593	TaYABBY4D	6D	310520716	310523936
TaYABBY5D	2D	486955433	486957936	TaYABBY4D	6D	310520716	310523936

## Sheet: Table S3
Table S3 Collinearity analysis between wheat and Brachypodium, rice, maize, and sorghum
gene ID	gene name	Chromosome location
TaYABBY1A	LOC_Os10g36420	Os10	19471068	19475406
TaYABBY1A	LOC_Os02g42950	Os1	24428640	24436429
TaYABBY3A	LOC_Os02g42950	Os1	24428640	24436429
TaYABBY3A	LOC_Os04g45330	Os4	26797650	26800253
TaYABBY2A	LOC_Os07g38410	Os7	23086434	23088524
TaYABBY4A	LOC_Os03g11600	Os3	6041245	6048687
TaYABBY5A	LOC_Os12g42610	Os12	26477633	26487388
TaYABBY6A	LOC_Os12g42610	Os12	26477633	26487388
TaYABBY6A	LOC_Os03g44710	Os3	25197057	25206961
TaYABBY5A	LOC_Os03g44710	Os3	25197057	25206961
TaYABBY6A	LOC_Os07g06620	Os7	3221592	3229297
TaYABBY7A	LOC_Os10g36420	Os10	19471068	19475406
TaYABBY7A	LOC_Os02g42950	Os1	24428640	24436429
TaYABBY7A	LOC_Os04g45330	Os4	26797650	26800253
TaYABBY1B	LOC_Os10g36420	Os10	19471068	19475406
TaYABBY3B	LOC_Os02g42950	Os1	24428640	24436429
TaYABBY3B	LOC_Os04g45330	Os4	26797650	26800253
TaYABBY2B	LOC_Os07g38410	Os7	23086434	23088524
TaYABBY4B	LOC_Os03g11600	Os3	6041245	6048687
TaYABBY5B	LOC_Os12g42610	Os12	26477633	26487388
TaYABBY6B	LOC_Os12g42610	Os12	26477633	26487388
TaYABBY6B	LOC_Os03g44710	Os3	25197057	25206961
TaYABBY5B	LOC_Os03g44710	Os3	25197057	25206961
TaYABBY6B	LOC_Os07g06620	Os7	3221592	3229297
TaYABBY7B	LOC_Os10g36420	Os10	19471068	19475406
TaYABBY7B	LOC_Os02g42950	Os1	24428640	24436429
TaYABBY7B	LOC_Os04g45330	Os4	26797650	26800253
TaYABBY1D	LOC_Os10g36420	Os10	19471068	19475406
TaYABBY1D	LOC_Os02g42950	Os1	24428640	24436429
TaYABBY3D	LOC_Os02g42950	Os1	24428640	24436429
TaYABBY3D	LOC_Os04g45330	Os4	26797650	26800253
TaYABBY2D	LOC_Os07g38410	Os7	23086434	23088524
TaYABBY4D	LOC_Os03g11600	Os3	6041245	6048687
TaYABBY5D	LOC_Os12g42610	Os12	26477633	26487388
TaYABBY5D	LOC_Os03g44710	Os3	25197057	25206961
TaYABBY7D	LOC_Os10g36420	Os10	19471068	19475406
TaYABBY7D	LOC_Os02g42950	Os1	24428640	24436429
TaYABBY7D	LOC_Os04g45330	Os4	26797650	26800253
TaYABBY1A	SObic.002G199200	Sb2	18034674	18039268
TaYABBY1A	SObic.004G302700	Sb4	64152542	64156221
TaYABBY1A	SObic.006G160800	Sb6	51868192	51871185
TaYABBY2A	SObic.002G346800	Sb2	63612865	63614287
TaYABBY3A	SObic.004G302700	Sb4	64152542	64156221
TaYABBY3A	SObic.006G160800	Sb6	51868192	51871185
TaYABBY4A	SObic.002G456000	Sb1	73205543	73210358
TaYABBY6A	SObic.002G152901	Sb1	12271177	12277291
TaYABBY6A	SObic.002G039400	Sb2	2938433	2941774
TaYABBY5A	SObic.008G176300	Sb8	61049083	61055589
TaYABBY6A	SObic.008G176300	Sb8	61049083	61055589
TaYABBY7A	SObic.002G199200	Sb2	18034674	18039268
TaYABBY7A	SObic.004G302700	Sb4	64152542	64156221
TaYABBY7A	SObic.006G160800	Sb6	51868192	51871185
TaYABBY1B	SObic.002G199200	Sb2	18034674	18039268
TaYABBY2B	SObic.002G346800	Sb2	63612865	63614287
TaYABBY3B	SObic.004G302700	Sb4	64152542	64156221
TaYABBY3B	SObic.006G160800	Sb6	51868192	51871185
TaYABBY4B	SObic.002G456000	Sb1	73205543	73210358
TaYABBY6B	SObic.002G152901	Sb1	12271177	12277291
TaYABBY5B	SObic.002G039400	Sb2	2938433	2941774
TaYABBY6B	SObic.002G039400	Sb2	2938433	2941774
TaYABBY5B	SObic.008G176300	Sb8	61049083	61055589
TaYABBY6B	SObic.008G176300	Sb8	61049083	61055589
TaYABBY7B	SObic.002G199200	Sb2	18034674	18039268
TaYABBY7B	SObic.004G302700	Sb4	64152542	64156221
TaYABBY7B	SObic.006G160800	Sb6	51868192	51871185
TaYABBY1D	SObic.002G199200	Sb2	18034674	18039268
TaYABBY1D	SObic.004G302700	Sb4	64152542	64156221
TaYABBY2D	SObic.002G346800	Sb2	63612865	63614287
TaYABBY3D	SObic.004G302700	Sb4	64152542	64156221
TaYABBY3D	SObic.006G160800	Sb6	51868192	51871185
TaYABBY4D	SObic.002G456000	Sb1	73205543	73210358
TaYABBY5D	SObic.002G039400	Sb2	2938433	2941774
TaYABBY5D	SObic.008G176300	Sb8	61049083	61055589
TaYABBY7D	SObic.002G199200	Sb2	18034674	18039268
TaYABBY7D	SObic.004G302700	Sb4	64152542	64156221
TaYABBY7D	SObic.006G160800	Sb6	51868192	51871185
TaYABBY1A	GRMZM2G167824	Zm1	225097097	225102315
TaYABBY1A	GRMZM2G529859	Zm5	189249290	189252175
TaYABBY1A	GRMZM2G074543	Zm5	23592937	23597115
TaYABBY3A	GRMZM2G005353	Zm10	133133767	133136401
TaYABBY3A	GRMZM2G054795	Zm2	23380099	23382093
TaYABBY3A	GRMZM2G529859	Zm5	189249290	189252175
TaYABBY2A	GRMZM2G046829	Zm7	159501156	159503146
TaYABBY4A	GRMZM2G088309	Zm1	26576546	26581707
TaYABBY4A	GRMZM2G102218	Zm9	146951299	146956589
TaYABBY5A	GRMZM2G141955	Zm1	175665423	175671657
TaYABBY6A	GRMZM2G141955	Zm1	175665423	175671657
TaYABBY5A	GRMZM2G116646	Zm3	89439022	89445313
TaYABBY6A	GRMZM2G074124	Zm5	16146472	16181777
TaYABBY7A	GRMZM2G005353	Zm10	133133767	133136401
TaYABBY7A	GRMZM2G054795	Zm2	23380099	23382093
TaYABBY1B	GRMZM2G167824	Zm1	225097097	225102315
TaYABBY3B	GRMZM2G005353	Zm10	133133767	133136401
TaYABBY3B	GRMZM2G054795	Zm2	23380099	23382093
TaYABBY3B	GRMZM2G529859	Zm5	189249290	189252175
TaYABBY2B	GRMZM2G046829	Zm7	159501156	159503146
TaYABBY4B	GRMZM2G088309	Zm1	26576546	26581707
TaYABBY4B	GRMZM2G102218	Zm9	146951299	146956589
TaYABBY6B	GRMZM2G085873	Zm1	260424101	260427079
TaYABBY5B	GRMZM2G141955	Zm1	175665423	175671657
TaYABBY6B	GRMZM2G141955	Zm1	175665423	175671657
TaYABBY5B	GRMZM2G116646	Zm3	89439022	89445313
TaYABBY6B	GRMZM2G074124	Zm5	16146472	16181777
TaYABBY7B	GRMZM2G005353	Zm10	133133767	133136401
TaYABBY7B	GRMZM2G054795	Zm2	23380099	23382093
TaYABBY1D	GRMZM2G167824	Zm1	225097097	225102315
TaYABBY1D	GRMZM2G074543	Zm5	23592937	23597115
TaYABBY3D	GRMZM2G005353	Zm10	133133767	133136401
TaYABBY3D	GRMZM2G054795	Zm2	23380099	23382093
TaYABBY3D	GRMZM2G529859	Zm5	189249290	189252175
TaYABBY2D	GRMZM2G046829	Zm7	159501156	159503146
TaYABBY4D	GRMZM2G088309	Zm1	26576546	26581707
TaYABBY4D	GRMZM2G102218	Zm9	146951299	146956589
TaYABBY5D	GRMZM2G141955	Zm1	175665423	175671657
TaYABBY5D	GRMZM2G116646	Zm3	89439022	89445313
TaYABBY5D	GRMZM2G074124	Zm5	16146472	16181777
TaYABBY7D	GRMZM2G005353	Zm10	133133767	133136401
TaYABBY7D	GRMZM2G054795	Zm2	23380099	23382093
TaYABBY1A	Bradi3g30410	Bd3	32270720	32275395
TaYABBY2A	Bradi1g24051	Bd1	19326939	19329327
TaYABBY3A	Bradi5g16910	Bd5	20326042	20328526
TaYABBY4A	Bradi1g69900	Bd1	68572285	68576778
TaYABBY6A	Bradi1g13570	Bd1	10432816	10441070
TaYABBY5A	Bradi4g01300	Bd4	820841	826355
TaYABBY7A	Bradi3g50050	Bd3	51023093	51026359
TaYABBY1B	Bradi3g30410	Bd3	32270720	32275395
TaYABBY2B	Bradi1g24051	Bd1	19326939	19329327
TaYABBY3B	Bradi5g16910	Bd5	20326042	20328526
TaYABBY4B	Bradi1g69900	Bd1	68572285	68576778
TaYABBY6B	Bradi1g13570	Bd1	10432816	10441070
TaYABBY5B	Bradi4g01300	Bd4	820841	826355
TaYABBY7B	Bradi3g50050	Bd3	51023093	51026359
TaYABBY1D	Bradi3g30410	Bd3	32270720	32275395
TaYABBY2D	Bradi1g24051	Bd1	19326939	19329327
TaYABBY3D	Bradi5g16910	Bd5	20326042	20328526
TaYABBY4D	Bradi1g69900	Bd1	68572285	68576778
TaYABBY5D	Bradi4g01300	Bd4	820841	826355
TaYABBY7D	Bradi3g50050	Bd3	51023093	51026359
TaYABBY7D	Bradi5g16910	Bd5	20326042	20328526

## Sheet: Table S4
Table S4 Raw data for qRT-PCR
	Figure 4. Different tissues				Figure 5. Different abiotic stresses					Figure 6. Salt stress in different time points
TaYABBY1A/D	Root	Stem	Leaf	Spike	CK	NaCl	PEG	Heat	Cold	0h	1h	2h	5h	7h	12h	24h
mean	1.00645	1.88349	24.2237	4.41524	1.00575	11.9817	14.2	0.105115	0.158294	1.0084	1.45258	8.9729	6.62183	3.14856	4.02072	4.18034
std	0.1382	0.479841	6.03293	0.587683	0.134719	1.83674	3.82074	0.0171157	0.00492281	0.154246	0.573645	1.44587	1.48238	0.057998	0.995078	0.933508
TaYABBY1B	Root	Stem	Leaf	Spike	CK	NaCl	PEG	Heat	Cold	0h	1h	2h	5h	7h	12h	24h
mean	1.02498	0.246048	1.65056	2.47642	1.00282	4.75358	2.18305	0.298428	1.49517	1.00506	2.95777	21.8328	4.48741	1.40455	1.48199	1.82241
std	0.261632	0.0272056	0.0630193	0.0684995	0.0935216	0.315087	0.194873	0.0485924	0.0467247	0.123586	0.399901	6.4186	0.794527	0.143814	0.168903	0.487357
TaYABBY2A/B/D	Root	Stem	Leaf	Spike	CK	NaCl	PEG	Heat	Cold	0h	1h	2h	5h	7h	12h	24h
mean	1.0317	0.534798	7.2911	22.3575	1.01642	2.98789	0.915547	0.0682422	0.470975	1.00131	0.985751	14.2286	7.618	2.22731	2.73104	4.01553
std	0.313562	0.0826128	1.61051	3.63718	0.221757	0.709975	0.220163	0.00223183	0.104059	0.0627775	0.172779	2.12198	0.26982	0.54399	0.596217	0.462011
TaYABBY3A/B	Root	Stem	Leaf	Spike	CK	NaCl	PEG	Heat	Cold	0h	1h	2h	5h	7h	12h	24h
mean	1.00052	1.59328	7.19958	6.88104	1.05418	2.6413	1.02901	0.0928224	0.159535	1.00964	5.71526	10.5338	4.4989	5.25502	6.66272	6.5584
std	0.0396103	0.149154	0.460807	0.273327	0.388588	0.196868	0.32621	0.00310873	0.0285235	0.168596	1.53	1.02186	0.536278	0.391277	0.938051	1.14823
TaYABBY3D	Root	Stem	Leaf	Spike	CK	NaCl	PEG	Heat	Cold	0h	1h	2h	5h	7h	12h	24h
mean	1.01103	1.43085	3.43781	2.10712	1.02065	1.73739	3.88907	0.345855	3.92326	1.00272	1.94751	19.1157	7.63566	3.21821	1.38388	0.999769
std	0.177766	0.163415	0.225694	0.166855	0.262073	0.335966	0.99238	0.0186499	0.254763	0.0904013	0.331811	1.68021	1.60413	0.180559	0.109568	0.124373
TaYABBY4A	Root	Stem	Leaf	Spike	CK	NaCl	PEG	Heat	Cold	0h	1h	2h	5h	7h	12h	24h
mean	1.00681	3.26151	15.0527	9.83093	1.03207	3.60976	0.940057	1.34694	0.137986	1.01115	1.52188	7.02343	3.55112	4.33757	4.31266	2.71955
std	0.140348	0.6943	2.99393	1.45632	0.310129	0.29935	0.0723638	0.104816	0.0402183	0.177814	0.449125	1.29304	0.189202	0.81983	0.487142	0.794979
TaYABBY4B	Root	Stem	Leaf	Spike	CK	NaCl	PEG	Heat	Cold	0h	1h	2h	5h	7h	12h	24h
mean	1.00074	0.489831	7.23696	2.86953	1.00368	6.99751	2.30255	0.244112	0.30104	1.01645	20.5042	26.8515	3.42729	3.35654	2.10182	2.12437
std	0.0472782	0.084937	0.542369	0.434791	0.107225	1.16912	0.209059	0.0150643	0.0191539	0.213884	0.0414278	4.74817	0.372129	0.850468	0.335923	0.470654
TaYABBY4D	Root	Stem	Leaf	Spike	CK	NaCl	PEG	Heat	Cold	0h	1h	2h	5h	7h	12h	24h
mean	1.00518	2.85611	33.534	9.90538	1.00124	3.12397	3.07364	0.0995086	0.117589	1.00387	1.64324	8.62653	5.28841	1.80432	1.79156	2.07592
std	0.127383	0.687743	3.62341	1.78369	0.0603781	0.770588	0.828697	0.0266722	0.0429614	0.108998	0.264159	0.750855	0.688819	0.307338	0.316803	0.2254
TaYABBY5A	Root	Stem	Leaf	Spike	CK	NaCl	PEG	Heat	Cold	0h	1h	2h	5h	7h	12h	24h
mean	1.0316	4.24271	17.7821	1.37816	1.04541	6.45574	4.15761	0.599857	0.193619	1.00095	2.41941	5.99167	1.26838	1.70207	1.94174	1.71224
std	0.328675	0.871759	2.14066	0.169431	0.399675	1.17753	0.843015	0.128858	0.0523256	0.0533255	0.432019	1.16699	0.149098	0.363552	0.459019	0.222819
TaYABBY5B	Root	Stem	Leaf	Spike	CK	NaCl	PEG	Heat	Cold	0h	1h	2h	5h	7h	12h	24h
mean	1.01831	2.27324	16.8982	1.47696	1.00298	21.0714	6.91245	1.10051	1.63456	1.00755	1.96412	13.8935	3.19753	4.89355	0.995231	1.13773
std	0.242563	0.27605	2.86368	0.0629885	0.0948198	3.84574	2.90015	0.0987166	0.562025	0.151151	0.469677	2.32168	1.03378	1.08582	0.210208	0.180309
TaYABBY5D	Root	Stem	Leaf	Spike	CK	NaCl	PEG	Heat	Cold	0h	1h	2h	5h	7h	12h	24h
mean	1.00112	10.3964	38.7558	14.0171	1.0365	9.97067	3.494	0.353362	0.41302	1.0073	2.37305	3.29559	1.58592	1.14063	2.59209	1.2107
std	0.0579857	2.53918	5.15805	1.87591	0.35374	0.394327	0.869479	0.0370857	0.00952699	0.150222	0.151707	0.306809	0.319968	0.362294	0.459711	0.301172
TaYABBY6A/B	Root	Stem	Leaf	Spike	CK	NaCl	PEG	Heat	Cold	0h	1h	2h	5h	7h	12h	24h
mean	1.00446	4.64994	37.1593	11.4784	1.01142	2.73814	4.62571	0.11111	0.175413	1.01169	1.39694	6.23916	2.75829	3.81316	4.01263	3.68244
std	0.116146	0.00048567	9.10447	3.42954	0.19229	0.285708	0.533884	0.0228207	0.0475275	0.186934	0.146145	1.28321	0.405554	0.851593	1.10475	1.09955
TaYABBY7A/B/D	Root	Stem	Leaf	Spike	CK	NaCl	PEG	Heat	Cold	0h	1h	2h	5h	7h	12h	24h
mean	1.00185	1.63043	19.1326	14.1265	1.01464	13.0536	3.37536	5.95742	0.480678	1.01495	0.851621	5.46548	1.60623	2.37338	2.20944	1.74358
std	0.0737508	0.105999	2.86344	0.511859	0.211114	2.6827	1.22969	1.14248	0.0832459	0.217096	0.134097	0.940655	0.357576	0.563939	0.345637	0.0957881
